# Supplementary material for: Unveiling the key role of excited-state hydrogen bonding in homogeneous photocatalytic CO2 reduction
Source: Royal Society of Chemistry journal article supplement (doi:10.1039/d3nj05851d), 2024-01-01
Supplement: d3nj05851d1.pdf [file d3nj05851d1.pdf]

## Supporting Information for

# Unveiling the Key Role of Excited-state Hydrogen Bonding in Homogeneous Photocatalytic CO<sub>2</sub> Reduction

Naitian Zhang, Yuehui Li, Wenzhe Shang, Wei Liu, Xusheng Cheng, Suchan Song, Xuedan Song, Yantao Shi\*, Ce Hao\*

### **Affiliations:**

*State Key laboratory of Fine Chemicals, School of Chemistry, Frontier Science Center for Smart Materials, Dalian University of Technology, Dalian, 116024, China.*

Corresponding authors: *E-mail address: haoce@dlut.edu.cn, shiyantao@dlut.edu.cn*

## Supplement of experimental facility and details

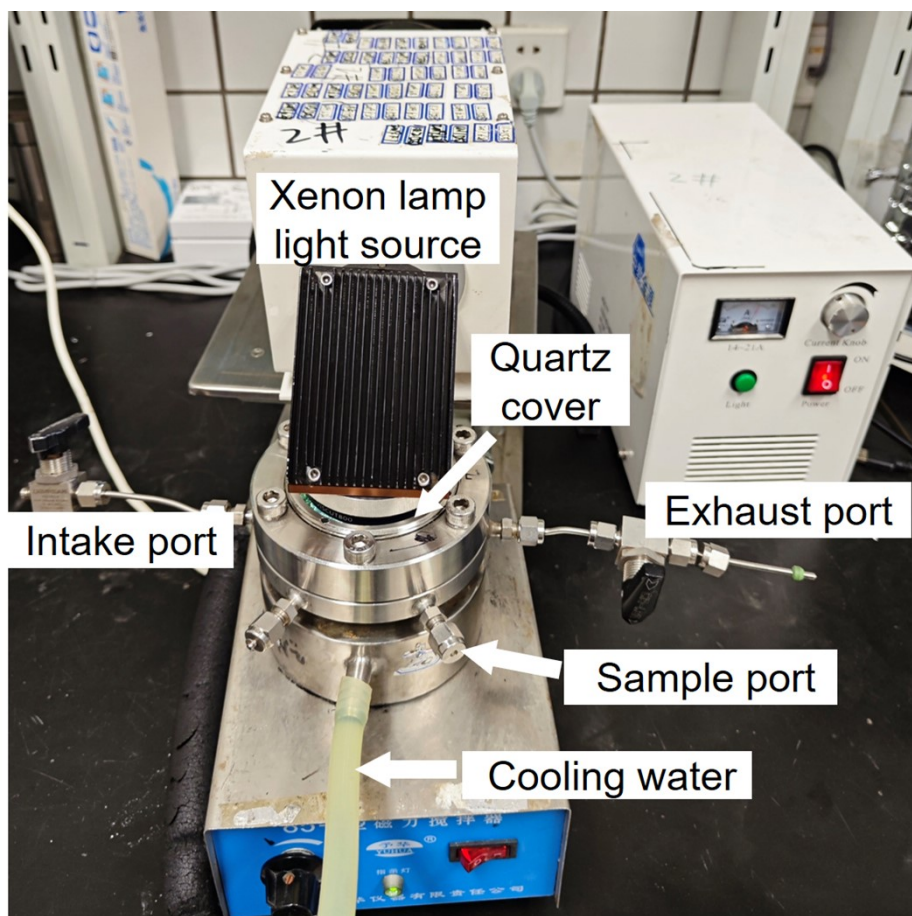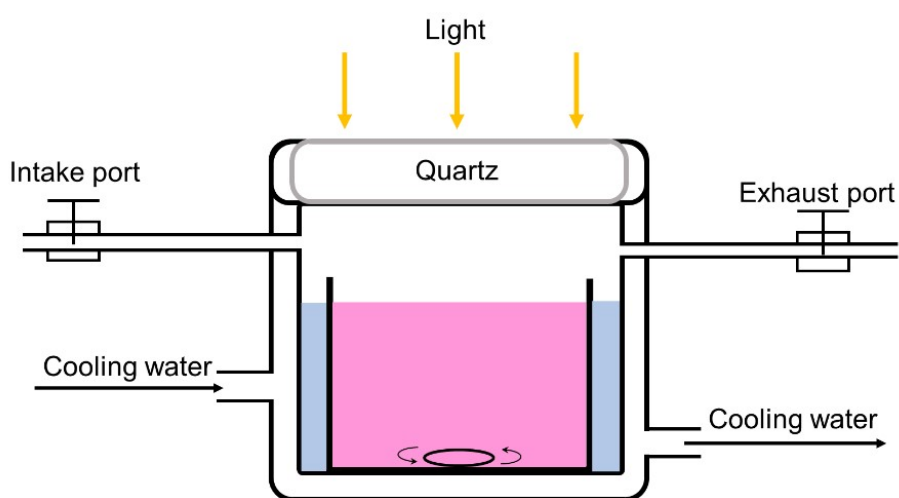

**Figure S1.** Schematic diagram of photocatalytic reaction device.

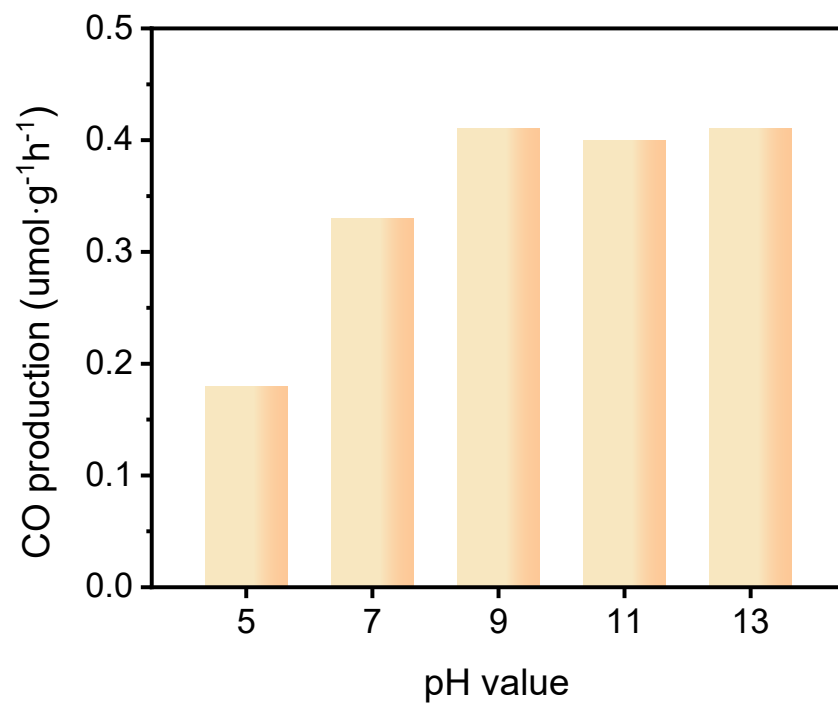

**Figure S2.** CO production versus pH value.

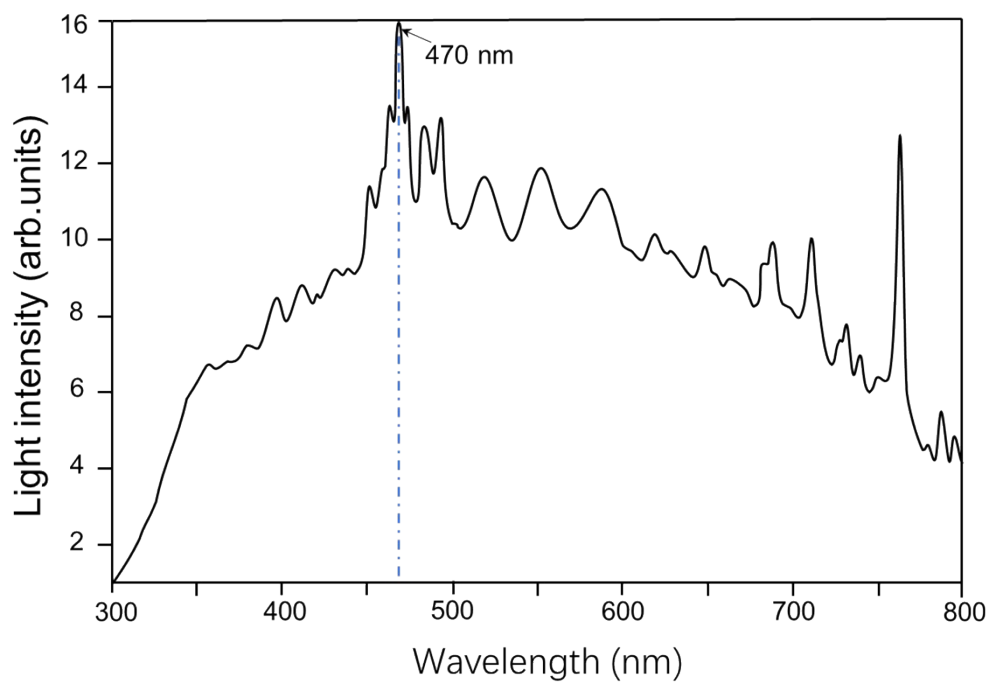

**Figure S3.** Xenon lamp spectrum

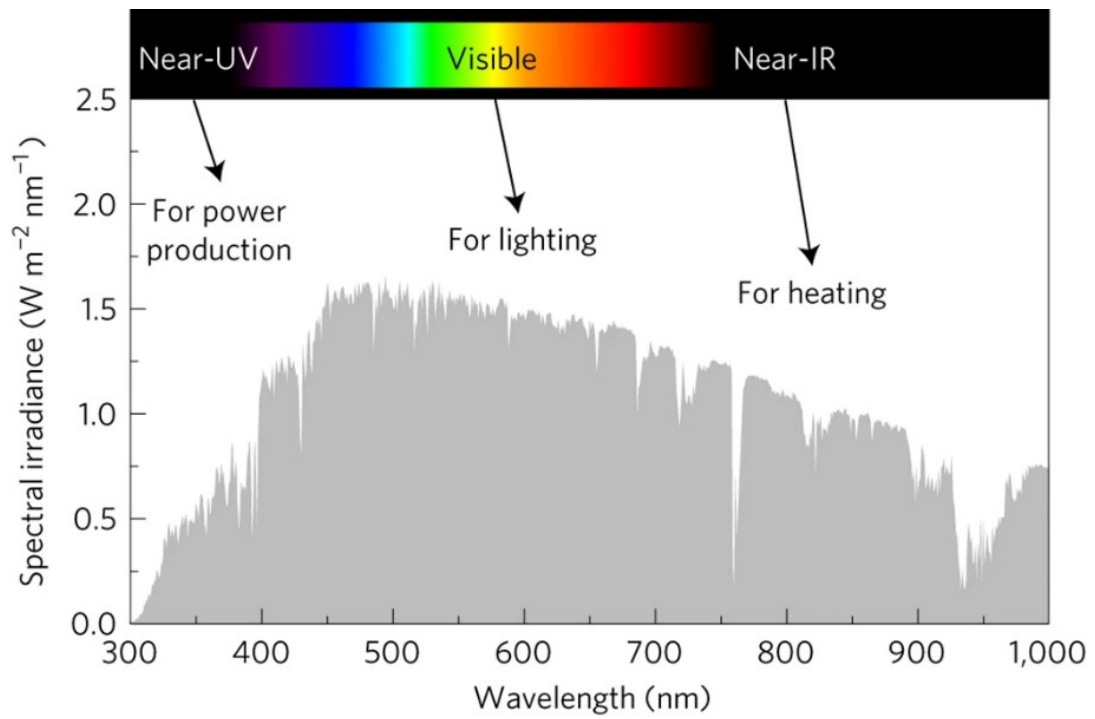

**Figure S4.** The solar spectrum.

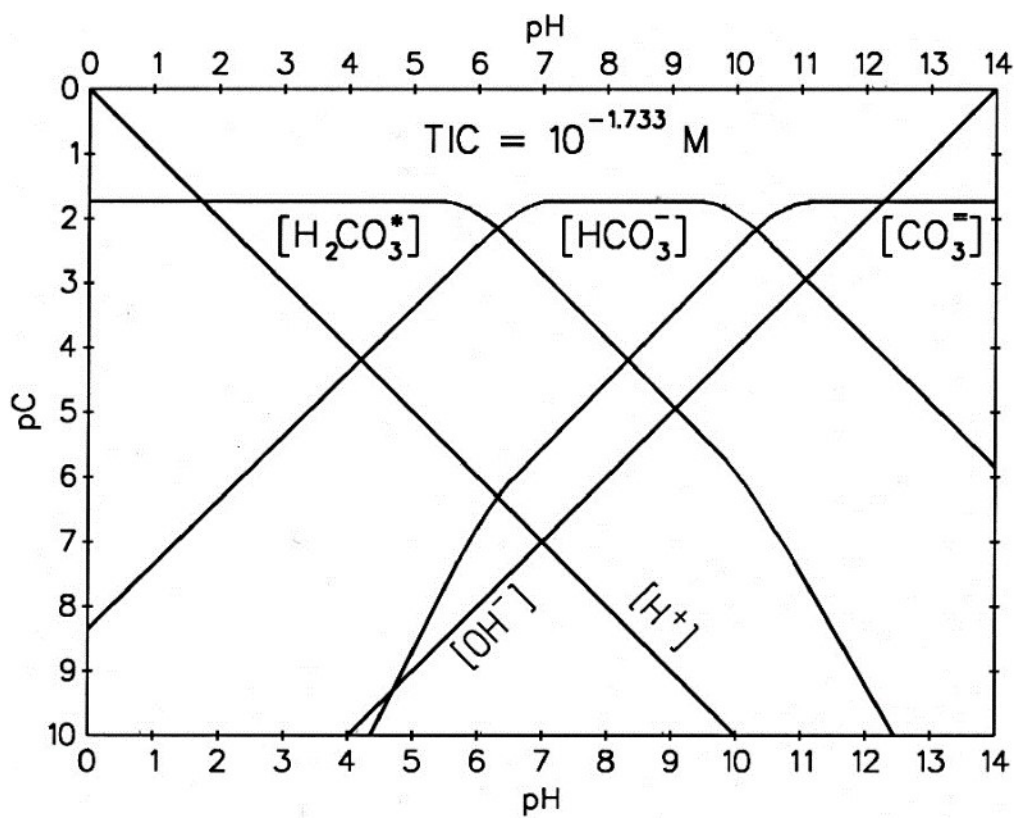

Figure S5. Graphical solution of carbonate equilibrium.

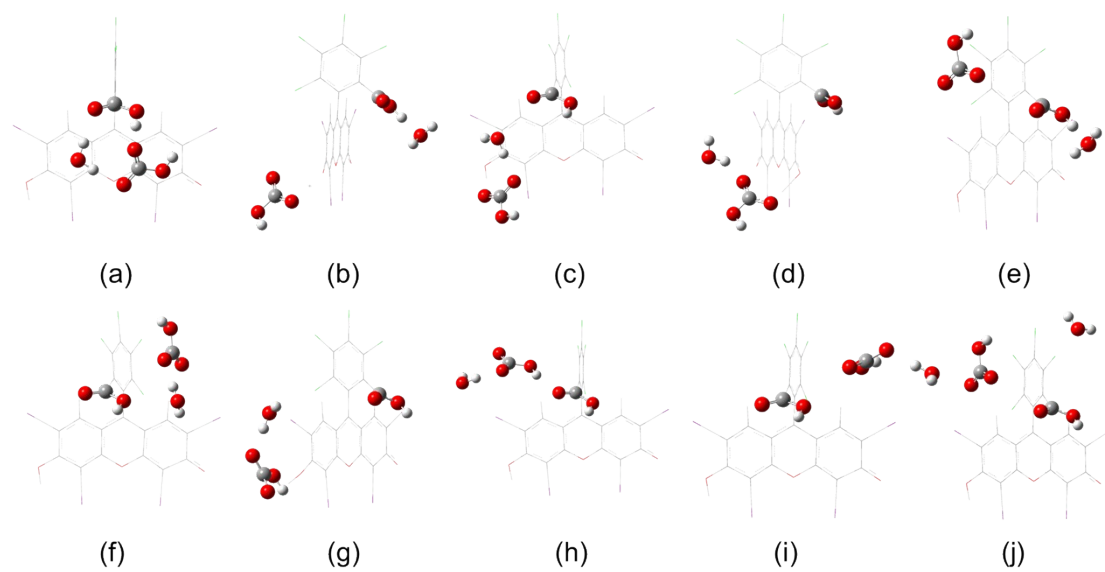

**Figure S6.** Structural models of different hydrogen bonding complexes.

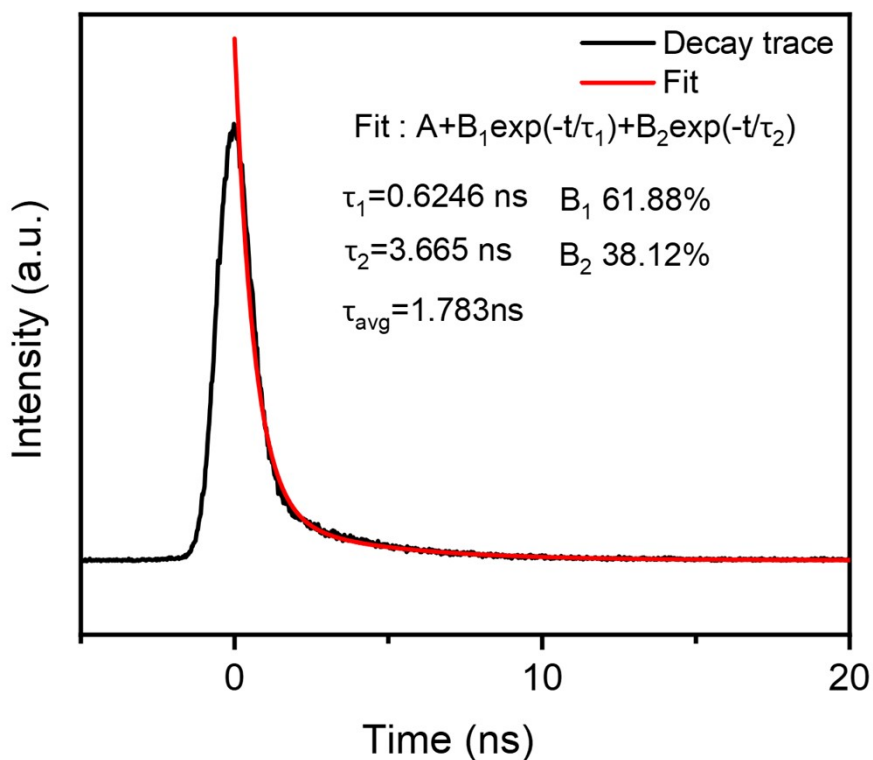

**Figure S7.** TRPL spectrum of Rose Bengal in water,  $\tau_{avg} = 1.783$ ns

Photoluminescence decay lifetimes:

$y(t)=A+B_1\exp(-t/\tau_1)+B_2\exp(-t/\tau_2)$ , ( $B_1+B_2=1$ ) represents the fractional contributions of the time-resolved decay lifetimes  $\tau_1$  and  $\tau_2$ . The average decay lifetime  $\tau_{avg}$  can be calculated

using the formula:  $\tau_{avg} = B_1 \tau_1 + B_2 \tau_2$



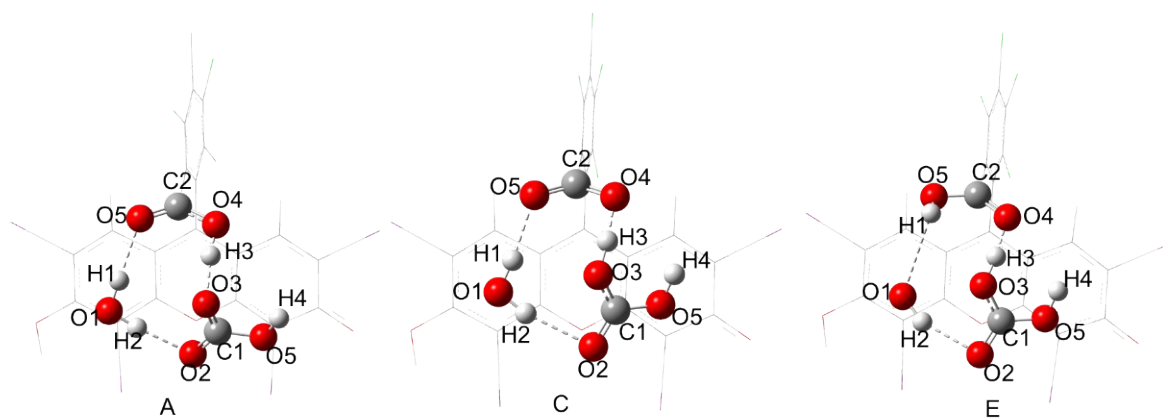

**Figure S8.** Structure of the hydrogen-bonded complexes of A C E.

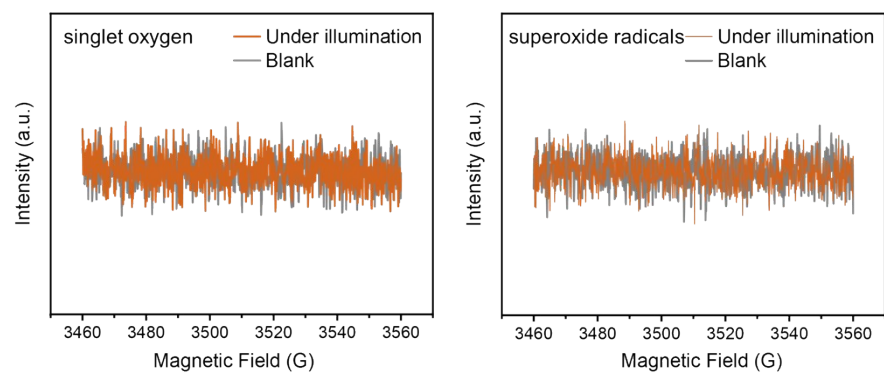

**Figure S9.** The ESR experiment of singlet oxygen and superoxide radicals.

**Table S1.** The relative energies of the different hydrogen-bonded complexes.

| Structures | Relative energies (kal/mol) |
|------------|-----------------------------|
| a          | 0                           |
| b          | 7.25                        |
| c          | 8.49                        |
| d          | 9.42                        |
| e          | 9.58                        |
| f          | 9.80                        |
| g          | 11.30                       |
| h          | 12.83                       |
| i          | 13.55                       |
| j          | 17.03                       |

**Table S2.** Hydrogen bond lengths, atom charge and electron spin population of the A C E hydrogen bond complex.

|                 | A      | C      | E      |
|-----------------|--------|--------|--------|
| lengths / Å     | —      | —      | —      |
| H1-O1           | 0.97   | 0.97   | 2.79   |
| H1-O5           | 1.96   | 1.91   | 1.06   |
| H3-O3           | 1.49   | 1.04   | 1.02   |
| H3-O4           | 1.03   | 1.47   | 1.56   |
| Charges         | —      | —      | —      |
| H1              | 0.272  | 0.280  | 0.344  |
| O1              | -0.628 | -0.608 | -0.447 |
| H2              | 0.274  | 0.268  | 0.286  |
| Spin population | —      | —      | —      |
| H1              | 0.000  | 0.000  | -0.001 |
| O1              | 0.001  | 0.001  | 0.821  |
| H2              | 0.000  | 0.000  | -0.020 |

**The reaction order is derived as follows:**

The total reaction rate is determined by the rate of the rate-limiting step:

$$r = -dc \left[ \begin{array}{c} \text{O} \\ \parallel \\ \text{H}_2\text{O} \cdots \text{O}=\text{C}-\text{O} \cdots \text{HO}-\text{C}-\text{OH} \\ | \\ \text{TCTIF} \end{array} \right]^{-*} / dt = k_5 c \left[ \begin{array}{c} \text{O} \\ \parallel \\ \text{H}_2\text{O} \cdots \text{O}=\text{C}-\text{O} \cdots \text{HO}-\text{C}-\text{OH} \\ | \\ \text{TCTIF} \end{array} \right]^{-*} \quad (1)$$

For the absorption equilibrium formed by  $\text{HCO}_3^-$ ,  $\text{CO}_2$ ,  $\text{H}_2\text{O}$  and the catalyst:

$$K_1 = c \left[ \begin{array}{c} \text{O} \\ \parallel \\ \text{H}_2\text{O} \cdots \text{O}=\text{C}-\text{O}-\text{H} \cdots \text{O}-\text{C}-\text{OH} \\ | \\ \text{TCTIF} \end{array} \right]^{-} / c(\text{H}_2\text{O}) c(\text{TCTIF}-\text{COOH}) c(\text{HCO}_3^-) \quad (2)$$

For the equilibrium between  $\begin{array}{c} \text{O} \\ \parallel \\ \text{H}_2\text{O} \cdots \text{O}=\text{C}-\text{O}-\text{H} \cdots \text{O}-\text{C}-\text{OH} \\ | \\ \text{TCTIF} \end{array} \right]^{-}$  And  $\begin{array}{c} \text{O} \\ \parallel \\ \text{H}_2\text{O} \cdots \text{O}=\text{C}-\text{O}-\text{H} \cdots \text{O}-\text{C}-\text{OH} \\ | \\ \text{TCTIF} \end{array} \right]^{-*}$  :

$$K_2 = c \left[ \begin{array}{c} \text{O} \\ \parallel \\ \text{H}_2\text{O} \cdots \text{O}=\text{C}-\text{O}-\text{H} \cdots \text{O}-\text{C}-\text{OH} \\ | \\ \text{TCTIF} \end{array} \right]^{-*} / c \left[ \begin{array}{c} \text{O} \\ \parallel \\ \text{H}_2\text{O} \cdots \text{O}=\text{C}-\text{O}-\text{H} \cdots \text{O}-\text{C}-\text{OH} \\ | \\ \text{TCTIF} \end{array} \right]^{-}$$

$$c \left[ \begin{array}{c} \text{O} \\ \parallel \\ \text{H}_2\text{O} \cdots \text{O}=\text{C}-\text{O}-\text{H} \cdots \text{O}-\text{C}-\text{OH} \\ | \\ \text{TCTIF} \end{array} \right]^{-*} = K_1 K_2 c(\text{H}_2\text{O}) c(\text{TCTIF}-\text{COOH}) c(\text{HCO}_3^-) \quad (3)$$

Then,

$$dc \left[ \begin{array}{c} \text{O} \\ \parallel \\ \text{H}_2\text{O} \cdots \text{O}=\text{C}-\text{O}-\text{H} \cdots \text{O}-\text{C}-\text{OH} \\ | \\ \text{TCTIF} \end{array} \right]^{-*} / dt = k_3 c \left[ \begin{array}{c} \text{O} \\ \parallel \\ \text{H}_2\text{O} \cdots \text{O}=\text{C}-\text{O}-\text{H} \cdots \text{O}-\text{C}-\text{OH} \\ | \\ \text{TCTIF} \end{array} \right]^{-*} - k_4 c \left[ \begin{array}{c} \text{O} \\ \parallel \\ \text{H}_2\text{O} \cdots \text{O}=\text{C}-\text{O}-\text{H} \cdots \text{O}-\text{C}-\text{OH} \\ | \\ \text{TCTIF} \end{array} \right]^{-*} = 0$$

$$k_3 c \left[ \begin{array}{c} \text{O} \\ \parallel \\ \text{H}_2\text{O} \cdots \text{O}=\text{C}-\text{O}-\text{H} \cdots \text{O}-\text{C}-\text{OH} \\ | \\ \text{TCTIF} \end{array} \right]^{-*} = k_4 c \left[ \begin{array}{c} \text{O} \\ \parallel \\ \text{H}_2\text{O} \cdots \text{O}=\text{C}-\text{O}-\text{H} \cdots \text{O}-\text{C}-\text{OH} \\ | \\ \text{TCTIF} \end{array} \right]^{-*} \quad (4)$$

For:  $\begin{array}{c} \text{O} \\ \parallel \\ \text{H}_2\text{O} \cdots \text{O}=\text{C}-\text{O} \cdots \text{HO}-\text{C}-\text{OH} \\ | \\ \text{TCTIF} \end{array} \right]^{-*}$

$$dc \left[ \begin{array}{c} \text{O} \\ \parallel \\ \text{H}_2\text{O} \cdots \text{O}=\text{C}-\text{O} \cdots \text{HO}-\text{C}-\text{OH} \\ | \\ \text{TCTIF} \end{array} \right]^{-*} / dt = k_4 c \left[ \begin{array}{c} \text{O} \\ \parallel \\ \text{H}_2\text{O} \cdots \text{O}=\text{C}-\text{O}-\text{H} \cdots \text{O}-\text{C}-\text{OH} \\ | \\ \text{TCTIF} \end{array} \right]^{-*} - k_5 c \left[ \begin{array}{c} \text{O} \\ \parallel \\ \text{H}_2\text{O} \cdots \text{O}=\text{C}-\text{O} \cdots \text{HO}-\text{C}-\text{OH} \\ | \\ \text{TCTIF} \end{array} \right]^{-*} = 0$$

$$k_4 c \left[ \begin{array}{c} \text{O} \\ \parallel \\ \text{H}_2\text{O} \cdots \text{O}=\text{C}-\text{O}-\text{H} \cdots \text{O}-\text{C}-\text{OH} \\ | \\ \text{TCTIF} \end{array} \right]^{-*} = k_5 c \left[ \begin{array}{c} \text{O} \\ \parallel \\ \text{H}_2\text{O} \cdots \text{O}=\text{C}-\text{O} \cdots \text{HO}-\text{C}-\text{OH} \\ | \\ \text{TCTIF} \end{array} \right]^{-*} \quad (5)$$

For:  $\begin{array}{c} \text{O} \\ \parallel \\ \text{H}_2\text{O} \cdots \text{HO}-\text{C}=\text{O} \cdots \text{HO}-\text{C}-\text{OH} \\ | \\ \text{TCTIF} \end{array} \right]^{-*}$

$$dc \left[ {}^3 \left( \text{H}_2\text{O} \cdots \underset{\text{TCTIF}}{\text{HO}-\text{C}=\text{O}} \cdots \underset{\text{TCTIF}}{\text{HO}-\overset{\text{O}}{\parallel}{\text{C}}-\text{OH}} \right)^{-*} \right] / dt = k_5 c \left[ {}^3 \left( \text{H}_2\text{O} \cdots \underset{\text{TCTIF}}{\text{H}-\text{O}-\text{C}=\text{O}} \cdots \underset{\text{TCTIF}}{\text{HO}-\overset{\text{O}}{\parallel}{\text{C}}-\text{OH}} \right)^{-*} \right] - k_6 c \left[ {}^3 \left( \text{H}_2\text{O} \cdots \underset{\text{TCTIF}}{\text{HO}-\text{C}=\text{O}} \cdots \underset{\text{TCTIF}}{\text{HO}-\overset{\text{O}}{\parallel}{\text{C}}-\text{OH}} \right)^{-*} \right] = 0$$

Then

$$k_5 c \left[ {}^3 \left( \text{H}_2\text{O} \cdots \underset{\text{TCTIF}}{\text{H}-\text{O}-\text{C}=\text{O}} \cdots \underset{\text{TCTIF}}{\text{HO}-\overset{\text{O}}{\parallel}{\text{C}}-\text{OH}} \right)^{-*} \right] = k_6 c \left[ {}^3 \left( \text{H}_2\text{O} \cdots \underset{\text{TCTIF}}{\text{HO}-\text{C}=\text{O}} \cdots \underset{\text{TCTIF}}{\text{HO}-\overset{\text{O}}{\parallel}{\text{C}}-\text{OH}} \right)^{-*} \right] \quad (6)$$

According (3) (4) (5) (6),

$$k_3 K_1 K_2 c(\text{H}_2\text{O}) c(\text{TCTIF-COOH}) c(\text{HCO}_3^-) = k_5 c \left[ {}^3 \left( \text{H}_2\text{O} \cdots \underset{\text{TCTIF}}{\text{H}-\text{O}-\text{C}=\text{O}} \cdots \underset{\text{TCTIF}}{\text{HO}-\overset{\text{O}}{\parallel}{\text{C}}-\text{OH}} \right)^{-*} \right] \quad (7)$$

For COOH<sup>-</sup>

$$dc(\text{COOH}^-) / dt = k_6 c \left[ {}^3 \left( \text{H}_2\text{O} \cdots \underset{\text{TCTIF}}{\text{HO}-\text{C}=\text{O}} \cdots \underset{\text{TCTIF}}{\text{HO}-\overset{\text{O}}{\parallel}{\text{C}}-\text{OH}} \right)^{-*} \right] - k_7 c(\text{COOH}^-) + k_7 c(\text{CO}) c(\text{OH}^-) = 0$$

$$k_6 c \left[ {}^3 \left( \text{H}_2\text{O} \cdots \underset{\text{TCTIF}}{\text{HO}-\text{C}=\text{O}} \cdots \underset{\text{TCTIF}}{\text{HO}-\overset{\text{O}}{\parallel}{\text{C}}-\text{OH}} \right)^{-*} \right] = k_7 c(\text{COOH}^-) - k_7 c(\text{CO}) c(\text{OH}^-)$$

Substitute into  $K_7 = c(\text{CO}) c(\text{OH}^-) / c(\text{COOH}^-)$

$$k_6 c \left[ {}^3 \left( \text{H}_2\text{O} \cdots \underset{\text{TCTIF}}{\text{HO}-\text{C}=\text{O}} \cdots \underset{\text{TCTIF}}{\text{HO}-\overset{\text{O}}{\parallel}{\text{C}}-\text{OH}} \right)^{-*} \right] = (k_7 / K_7 - k_7) c(\text{CO}) c(\text{OH}^-)$$

$$k_5 c \left[ {}^3 \left( \text{H}_2\text{O} \cdots \underset{\text{TCTIF}}{\text{H}-\text{O}-\text{C}=\text{O}} \cdots \underset{\text{TCTIF}}{\text{HO}-\overset{\text{O}}{\parallel}{\text{C}}-\text{OH}} \right)^{-*} \right] = (k_7 / K_7 - k_7) c(\text{CO}) c(\text{OH}^-) \quad (8)$$

According (6) have

According (1)

$$r = -dc \left[ {}^3 \left( \text{H}_2\text{O} \cdots \underset{\text{TCTIF}}{\text{H}-\text{O}-\text{C}=\text{O}} \cdots \underset{\text{TCTIF}}{\text{HO}-\overset{\text{O}}{\parallel}{\text{C}}-\text{OH}} \right)^{-*} \right] / dt = k_5 c \left[ {}^3 \left( \text{H}_2\text{O} \cdots \underset{\text{TCTIF}}{\text{H}-\text{O}-\text{C}=\text{O}} \cdots \underset{\text{TCTIF}}{\text{HO}-\overset{\text{O}}{\parallel}{\text{C}}-\text{OH}} \right)^{-*} \right]$$

Substituting (7) and (8) into the left and right sides respectively

$$-(k_3 K_1 K_2 / k_5) dc \left[ (\text{H}_2\text{O}) c(\text{TCTIF-COOH}) c(\text{HCO}_3^-) \right] / dt = (k_7 / K_7 - k_7) c(\text{CO}) c(\text{OH}^-)$$

Since TCTIF-COOH, H<sub>2</sub>O and OH<sup>-</sup> can be considered to be constant

$$-(k_3 K_1 K_2 / k_5) dc(\text{HCO}_3^-) / dt = (k_7 / K_7 - k_7) c(\text{CO}) c(\text{OH}^-)$$

$$dc(\text{HCO}_3^-) / dt = -k_5 (k_7 / K_7 - k_7) / k_3 K_1 K_2 c(\text{CO}) c(\text{OH}^-)$$

$$-k_5 (k_7 / K_7 - k_7) / k_3 K_1 K_2 c(\text{OH}^-) = k'$$

The concentration of the catalyst is constant,

$$dc(\text{HCO}_3^-) / dt = k' c(\text{CO})$$

The CO<sub>2</sub>RR is a first order reaction for the product CO.
